# Supplementary material for: Dioxin-Linked Covalent Organic Framework-Supported Palladium Complex for Rapid Room-Temperature Suzuki–Miyaura Coupling Reaction
Source: MDPI journal article supplement (doi:10.3390/cryst13081268), 2023-08-17
Supplement: s1 [file s1]

## Supplementary Materials

# Dioxin-Linked COF Supported Palladium Complex for Rapid Room Temperature Suzuki–Miyaura Coupling Reaction

Allea Campbell,<sup>1</sup> Ziad Alsudairy,<sup>1</sup> Chaochao Dun,<sup>2</sup> Fazli Akram,<sup>1</sup> Kayla Smith-Petty,<sup>1</sup> Abrianna Ambus,<sup>1</sup> Danielle Bingham,<sup>1</sup> Tandabany Dinadayalane,<sup>1</sup> Conrad Ingram,<sup>1</sup> Xinle Li<sup>\*1</sup>

<sup>1</sup> Department of Chemistry, Clark Atlanta University, Atlanta, Georgia 30314, United States

<sup>2</sup> The Molecular Foundry, Lawrence Berkeley National Laboratory Berkeley, Berkeley, CA, 94720, USA

\*Corresponding author. Email: xli1@cau.edu

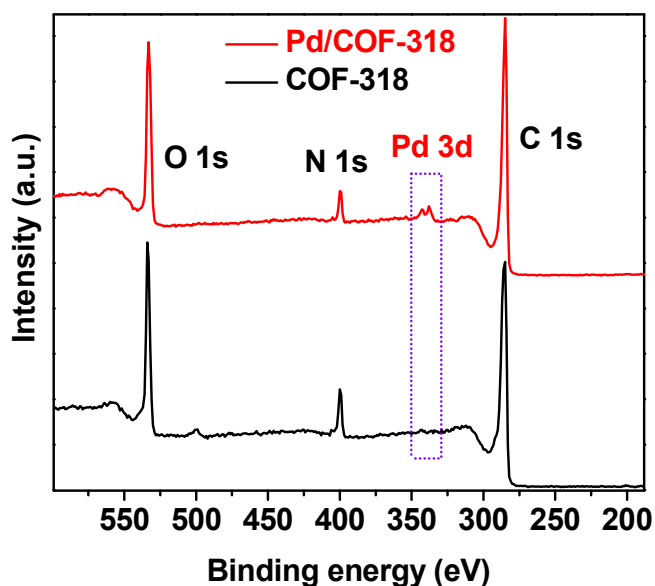

**Figure S1.** XPS survey spectra of COF-318 and Pd/COF-318.

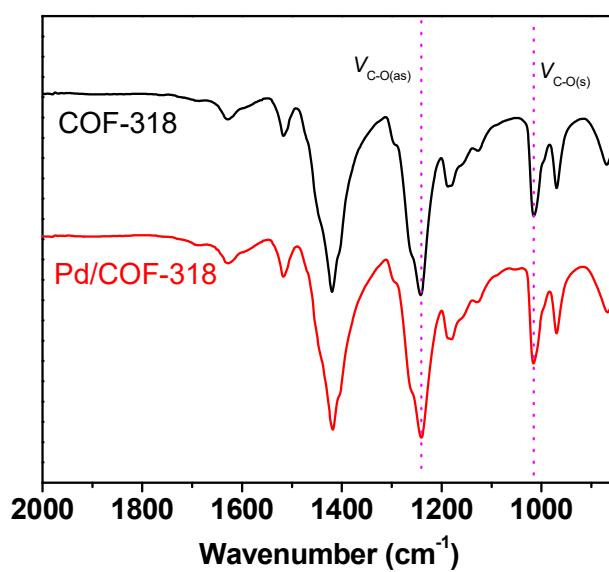

**Figure S2.** FTIR spectra of COF-318 and Pd/COF-318.

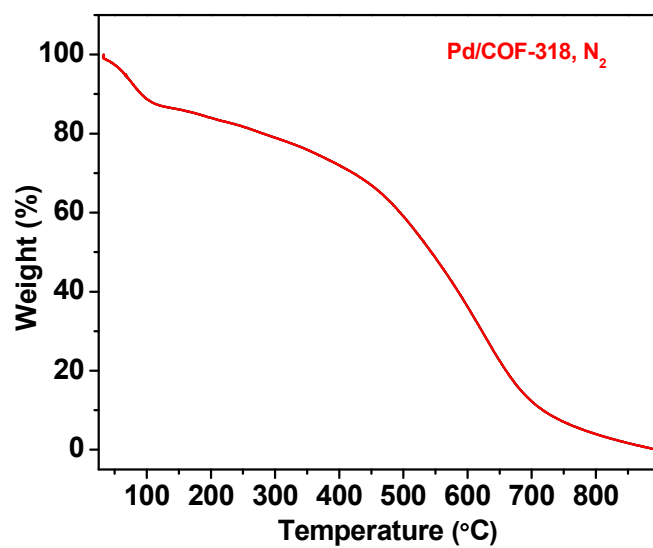

**Figure S3.** TGA trace for the Pd/COF-318 under N<sub>2</sub> atmosphere.

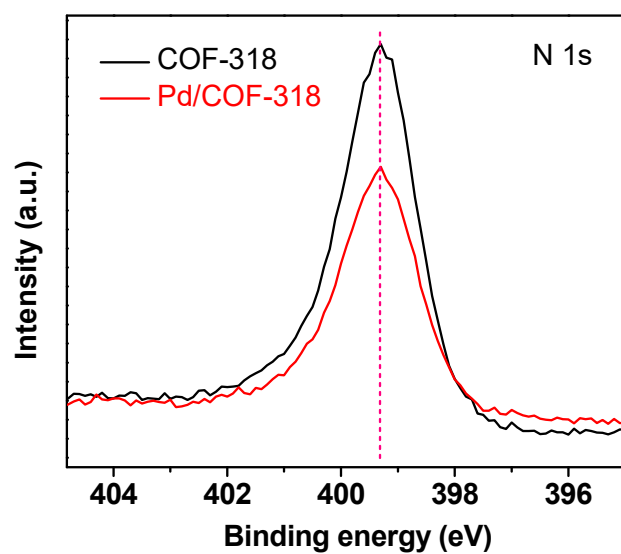

**Figure S4.** XPS N 1s spectra of COF-318 and Pd/COF-318.

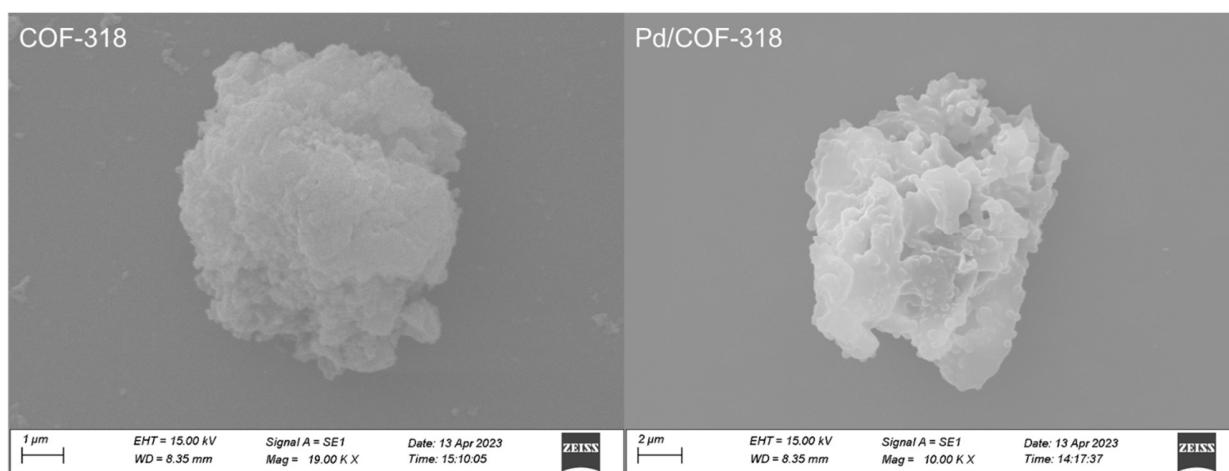

**Figure S5.** SEM images of COF-318 and Pd/COF-318.

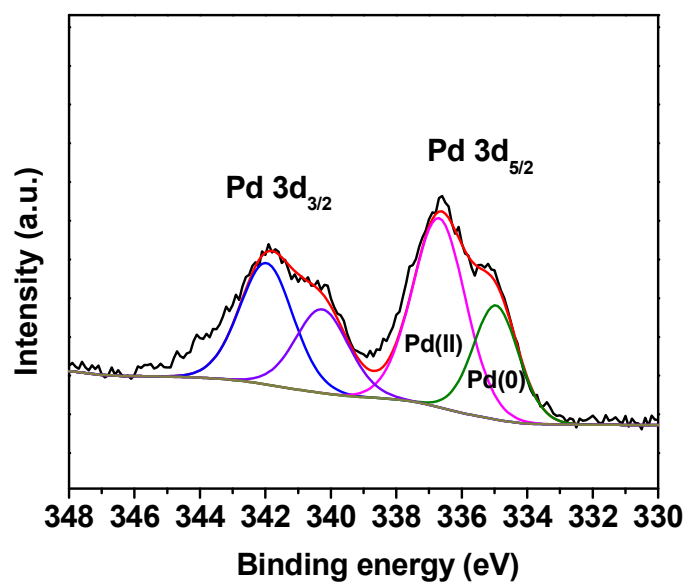

**Figure S6.** XPS Pd 3d spectrum of used Pd/COF-318, indicating a 34 mol% of Pd(0) in the recovered catalyst.

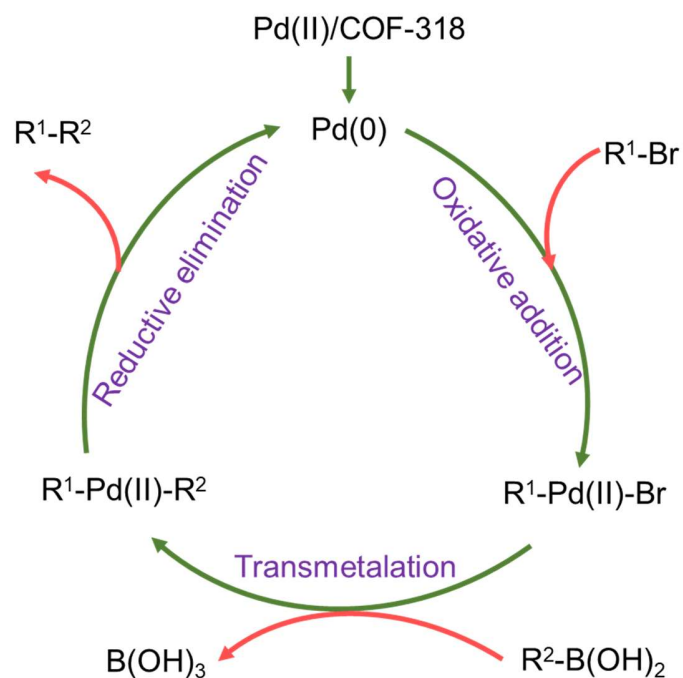

**Scheme S1.** The catalytic mechanism for Pd/COF-catalyzed Suzuki-Miyaura cross-coupling reaction.
